# Supplementary material
Source: Springer Nature journal article supplement (https://www.springermedizin.de/resource/supplementary/13037_2011_102_MOESM2_ESM.pdf/9659322)
Supplement: MOESM2 [file 9659322]

Surgery

versus

Research

Clinical experience

Scientific experience

Long-lasting training timeline

Early career opportunity

Further medical training

Further scientific training

Economic pressure

Financial freedom

Salary scale ↑

Salary scale ↓
